# Supplementary material for: Multi-element signal enhancement mechanism investigation for laser ablation-assisted ultraviolet laser excited atomic fluorescence
Source: Royal Society of Chemistry journal article supplement (doi:10.1039/d3ja00002h), 2023-01-01
Supplement: d3ja00002h1.pdf [file d3ja00002h1.pdf]

Supplementary Material:

**Multi-element Signal Enhancement Mechanism Investigation for  
Laser Ablation Assisted Ultraviolet Laser Excited Atomic  
Fluorescence**

Kaikai KOU<sup>a,b</sup>, Weiran SONG<sup>a,b</sup>, Weilun GU<sup>a,b</sup>, Jiachen LIU<sup>a,b</sup>, Yuzhou SONG<sup>a,b</sup>, Jianxun JI<sup>a,b</sup>, Zongyu

HOU<sup>a,b</sup>, Zhe WANG<sup>a,b\*</sup>

<sup>a</sup> *State Key Lab of Power Systems, International Joint Laboratory on Low Carbon Clean Energy  
Innovation, Department of Energy and Power Engineering, Tsinghua University, Beijing, 100084, China*

<sup>b</sup> *Shanxi Research Institute for Clean Energy, Tsinghua University, Taiyuan, 030032, China*

\*Corresponding author. Zhe WANG: [zhewang@tsinghua.edu.cn](mailto:zhewang@tsinghua.edu.cn).

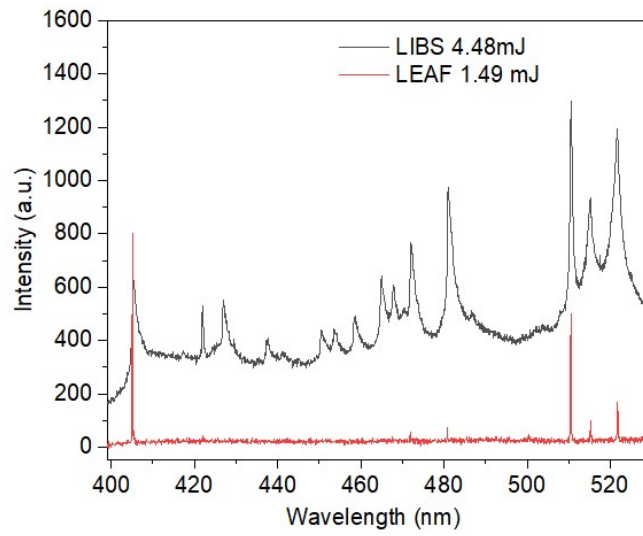

Fig. S1 Original spectra of LIBS and LEAF scheme.  $E_a = 4.48$  mJ in LIBS scheme.  $E_a = 1.49$  mJ,  $E_c = 0.6$  mJ,  $t_{ip} = 200$  ns in LEAF scheme.

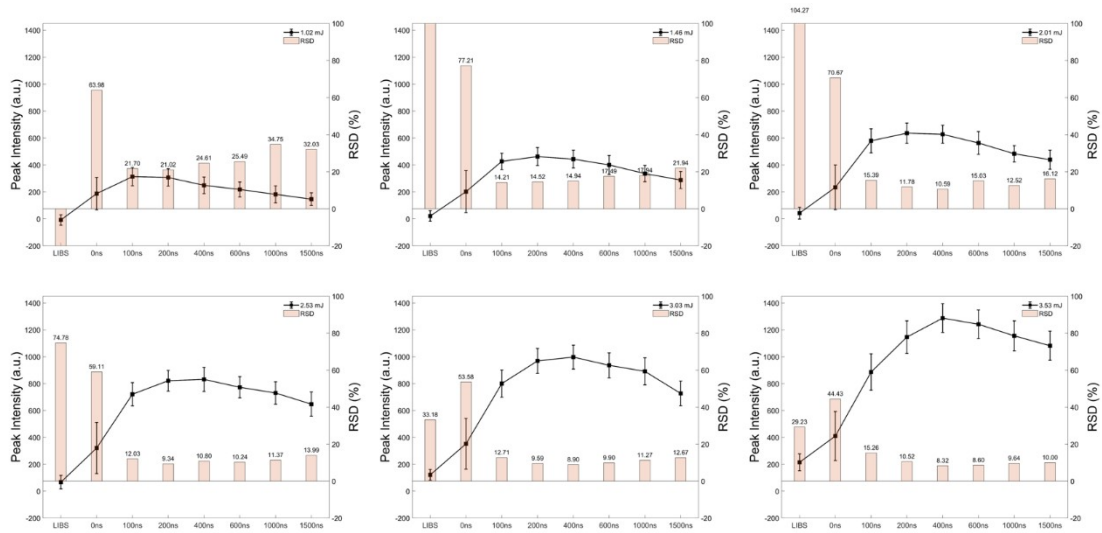

Fig. S2 Effect of ablation laser energy and inter-pulse delay ( $t_{ip}$ ) on Cu I (510.55 nm) emission intensity and RSD. Laser energy of 193 nm was 0.6 mJ.

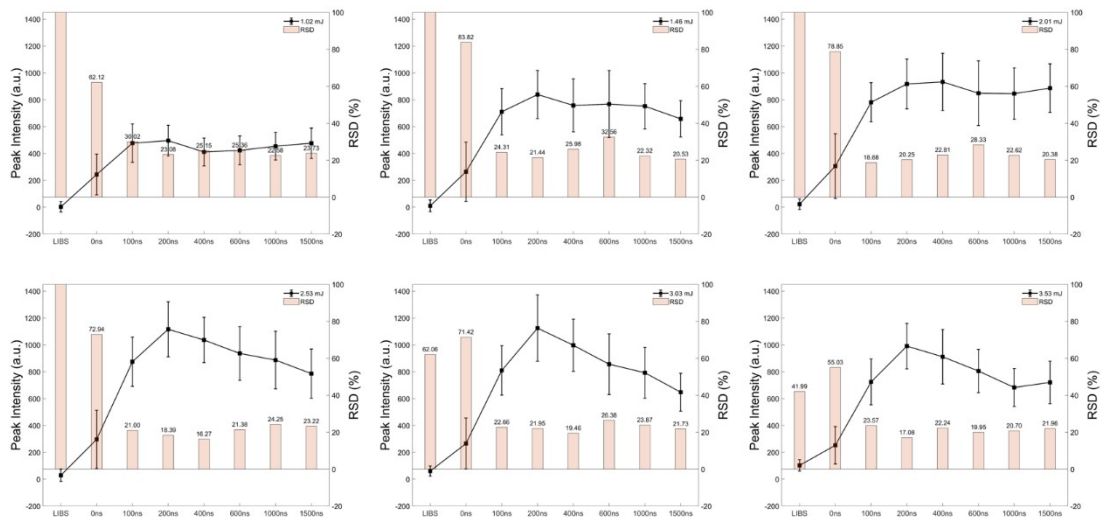

Fig. S3 Effect of ablation laser energy and inter-pulse delay ( $t_{ip}$ ) on Pb I (405.78 nm) emission intensity and RSD. Laser energy of 193 nm was 0.6 mJ.
